# Supplementary material for: Development of a therapeutic vaccine targeting Merkel cell polyomavirus capsid protein VP1 against Merkel cell carcinoma
Source: PubMed Central journal article supplement (PMC8492671; doi:10.1038/s41541-021-00382-9), 2021-10-05
Supplement: 41541_2021_382_MOESM2_ESM.pdf [file 41541_2021_382_MOESM2_ESM.pdf]

## Reporting Summary

Nature Portfolio wishes to improve the reproducibility of the work that we publish. This form provides structure for consistency and transparency in reporting. For further information on Nature Portfolio policies, see our [Editorial Policies](#) and the [Editorial Policy Checklist](#).

### Statistics

For all statistical analyses, confirm that the following items are present in the figure legend, table legend, main text, or Methods section.

n/a Confirmed

- |                                     |                                     |                                                                                                                                                                                                                                                            |
|-------------------------------------|-------------------------------------|------------------------------------------------------------------------------------------------------------------------------------------------------------------------------------------------------------------------------------------------------------|
| <input type="checkbox"/>            | <input checked="" type="checkbox"/> | The exact sample size ( $n$ ) for each experimental group/condition, given as a discrete number and unit of measurement                                                                                                                                    |
| <input type="checkbox"/>            | <input checked="" type="checkbox"/> | A statement on whether measurements were taken from distinct samples or whether the same sample was measured repeatedly                                                                                                                                    |
| <input type="checkbox"/>            | <input checked="" type="checkbox"/> | The statistical test(s) used AND whether they are one- or two-sided<br><i>Only common tests should be described solely by name; describe more complex techniques in the Methods section.</i>                                                               |
| <input type="checkbox"/>            | <input checked="" type="checkbox"/> | A description of all covariates tested                                                                                                                                                                                                                     |
| <input type="checkbox"/>            | <input checked="" type="checkbox"/> | A description of any assumptions or corrections, such as tests of normality and adjustment for multiple comparisons                                                                                                                                        |
| <input type="checkbox"/>            | <input checked="" type="checkbox"/> | A full description of the statistical parameters including central tendency (e.g. means) or other basic estimates (e.g. regression coefficient) AND variation (e.g. standard deviation) or associated estimates of uncertainty (e.g. confidence intervals) |
| <input type="checkbox"/>            | <input checked="" type="checkbox"/> | For null hypothesis testing, the test statistic (e.g. $F$ , $t$ , $r$ ) with confidence intervals, effect sizes, degrees of freedom and $P$ value noted<br><i>Give <math>P</math> values as exact values whenever suitable.</i>                            |
| <input checked="" type="checkbox"/> | <input type="checkbox"/>            | For Bayesian analysis, information on the choice of priors and Markov chain Monte Carlo settings                                                                                                                                                           |
| <input checked="" type="checkbox"/> | <input type="checkbox"/>            | For hierarchical and complex designs, identification of the appropriate level for tests and full reporting of outcomes                                                                                                                                     |
| <input type="checkbox"/>            | <input checked="" type="checkbox"/> | Estimates of effect sizes (e.g. Cohen's $d$ , Pearson's $r$ ), indicating how they were calculated                                                                                                                                                         |

*Our web collection on [statistics for biologists](#) contains articles on many of the points above.*

### Software and code

Policy information about [availability of computer code](#)

Data collection Microsoft Excel, FlowJo

Data analysis GraphPad Prism 8

For manuscripts utilizing custom algorithms or software that are central to the research but not yet described in published literature, software must be made available to editors and reviewers. We strongly encourage code deposition in a community repository (e.g. GitHub). See the Nature Portfolio [guidelines for submitting code & software](#) for further information.

### Data

Policy information about [availability of data](#)

All manuscripts must include a [data availability statement](#). This statement should provide the following information, where applicable:

- Accession codes, unique identifiers, or web links for publicly available datasets
- A description of any restrictions on data availability
- For clinical datasets or third party data, please ensure that the statement adheres to our [policy](#)

The data that support the findings of this study are available from the corresponding author upon reasonable. This study did not generate any unique code.

## Field-specific reporting

Please select the one below that is the best fit for your research. If you are not sure, read the appropriate sections before making your selection.

Life sciences  Behavioural & social sciences  Ecological, evolutionary & environmental sciences

For a reference copy of the document with all sections, see [nature.com/documents/nr-reporting-summary-flat.pdf](https://www.nature.com/documents/nr-reporting-summary-flat.pdf)

## Life sciences study design

All studies must disclose on these points even when the disclosure is negative.

|                 |                                                                                                                        |
|-----------------|------------------------------------------------------------------------------------------------------------------------|
| Sample size     | All animal experiments were performed with 5-6 mice/group, all data were analyzed using One-way ANOVA or Two-way ANOVA |
| Data exclusions | No data was excluded in any experiments.                                                                               |
| Replication     | All experiments were repeated twice or thrice, all data could be reproduced.                                           |
| Randomization   | All experiment animals including tumor-bearing mice were divided into groups randomly.                                 |
| Blinding        | This study is a preclinical study to investigate a therapeutic vaccine, blinding is not necessary.                     |

## Reporting for specific materials, systems and methods

We require information from authors about some types of materials, experimental systems and methods used in many studies. Here, indicate whether each material, system or method listed is relevant to your study. If you are not sure if a list item applies to your research, read the appropriate section before selecting a response.

### Materials & experimental systems

| n/a                                 | Involvement in the study                                        |
|-------------------------------------|-----------------------------------------------------------------|
| <input type="checkbox"/>            | <input checked="" type="checkbox"/> Antibodies                  |
| <input type="checkbox"/>            | <input checked="" type="checkbox"/> Eukaryotic cell lines       |
| <input checked="" type="checkbox"/> | <input type="checkbox"/> Palaeontology and archaeology          |
| <input type="checkbox"/>            | <input checked="" type="checkbox"/> Animals and other organisms |
| <input checked="" type="checkbox"/> | <input type="checkbox"/> Human research participants            |
| <input checked="" type="checkbox"/> | <input type="checkbox"/> Clinical data                          |
| <input checked="" type="checkbox"/> | <input type="checkbox"/> Dual use research of concern           |

### Methods

| n/a                                 | Involvement in the study                           |
|-------------------------------------|----------------------------------------------------|
| <input checked="" type="checkbox"/> | <input type="checkbox"/> ChIP-seq                  |
| <input type="checkbox"/>            | <input checked="" type="checkbox"/> Flow cytometry |
| <input checked="" type="checkbox"/> | <input type="checkbox"/> MRI-based neuroimaging    |

## Antibodies

|                 |                                                                                                                                                                                                                                                                                                                                                                                                                                                                                                                                                                                                                                                                                                                                                                                                                                                                                           |
|-----------------|-------------------------------------------------------------------------------------------------------------------------------------------------------------------------------------------------------------------------------------------------------------------------------------------------------------------------------------------------------------------------------------------------------------------------------------------------------------------------------------------------------------------------------------------------------------------------------------------------------------------------------------------------------------------------------------------------------------------------------------------------------------------------------------------------------------------------------------------------------------------------------------------|
| Antibodies used | eFlour780 FVD(eBioscience, #65-0865-14), anti-CD3-eFluor506 (eBioscience, #69-0032-82, Clone: 17A2), anti-CD4-FITC(BD, #553047, Clone: GK1.5), and anti-CD8-PE (BD, #553033, Clone: 53-6.7), anti-IL-2-Percp/Cy5.5 (BD, #560544, Clone: JES6-5H4), anti-TNF- $\alpha$ -APC (Biolegend, #506308, Clone: MP6-XT22), anti-IFN- $\gamma$ -BV421 (Biolegend, #505803, Clone: XMG1.2), anti-FOXP3-BV421(Biolegend, #126419, Clone: MF-14) and anti-LAP-PE/Cy7 (eBioscience, #25-9821-80, Clone: TW7-16B4), FITC-conjugated Rat anti-mouse IgG (Biolegend, #406001, Clone: B249772), InVivoMab anti-mouse CD3e(BioXcell, #BE0001-1, Clone: 145-2C11), InVivoMab anti-mouse CD4(BioXcell, #BE0119, Clone: YTS 191), InVivoMab anti-mouse CD8(BioXcell, #BE0061, Clone: 2.43), Goat Anti-Mouse IgG(H+L)-HRP conjugate(BioRad, #1706516), Goat Anti-Rabbit IgG(H+L)-HRP conjugate(BioRad, #1706515) |
| Validation      | Several repeated tests for antibodies were performed with positive and negative controls for insure their qualities.                                                                                                                                                                                                                                                                                                                                                                                                                                                                                                                                                                                                                                                                                                                                                                      |

## Eukaryotic cell lines

Policy information about [cell lines](#)

|                                                                   |                                                                                                                                                                                             |
|-------------------------------------------------------------------|---------------------------------------------------------------------------------------------------------------------------------------------------------------------------------------------|
| Cell line source(s)                                               | 4T1 mammary tumor cells( CRL-2539™) were purchased from ATCC. CMS5 murine sarcoma cells were kindly provided from Dr You-yong Lu, Beijing Cancer Hospital, Cancer Research Institute, China |
| Authentication                                                    | N/A                                                                                                                                                                                         |
| Mycoplasma contamination                                          | N/A                                                                                                                                                                                         |
| Commonly misidentified lines (See <a href="#">ICLAC</a> register) | N/A                                                                                                                                                                                         |

## Animals and other organisms

Policy information about [studies involving animals](#); [ARRIVE guidelines](#) recommended for reporting animal research

|                         |                                                                                                                                          |
|-------------------------|------------------------------------------------------------------------------------------------------------------------------------------|
| Laboratory animals      | BALB/c female mice aged 6-8weeks were used.                                                                                              |
| Wild animals            | N/A                                                                                                                                      |
| Field-collected samples | All BALB/C mice involved in the study were maintained under specific pathogen-free conditions.                                           |
| Ethics oversight        | All animal experiments were approved by the Committee of Experimental Animals of SHMC with the following reference number: 20160225-115. |

Note that full information on the approval of the study protocol must also be provided in the manuscript.

## Flow Cytometry

### Plots

Confirm that:

- The axis labels state the marker and fluorochrome used (e.g. CD4-FITC).
- The axis scales are clearly visible. Include numbers along axes only for bottom left plot of group (a 'group' is an analysis of identical markers).
- All plots are contour plots with outliers or pseudocolor plots.
- A numerical value for number of cells or percentage (with statistics) is provided.

### Methodology

|                           |                                                                                                                                                                                                                                                                                                                                                                                                                                                                                                                                                                                                                                                                                                                                        |
|---------------------------|----------------------------------------------------------------------------------------------------------------------------------------------------------------------------------------------------------------------------------------------------------------------------------------------------------------------------------------------------------------------------------------------------------------------------------------------------------------------------------------------------------------------------------------------------------------------------------------------------------------------------------------------------------------------------------------------------------------------------------------|
| Sample preparation        | Splenocytes isolated from vaccine immunized CMS5-VP1 tumor-bearing mice were stimulated with VP1, or PMA/Ionomycin as the positive control. Stimulated cells were surface stained with FVD-eFluor780, anti-CD3-eFluor506, anti-CD4-FITC, anti-CD8-PE. After surface staining, the cells were intracellularly stained with anti-IL-2-PerCP/Cy5.5, anti-TNF- $\alpha$ -APC, anti-IFN- $\gamma$ -BV421. Cells were washed twice and then resuspended with 200 $\mu$ l FBS.<br>For Treg staining, lymphocytes from lymph node were surface stained with eFluor780 conjugated FVD, anti-CD3-eFluor506, anti-CD4-FITC, and anti-CD8-PE, then stained with anti-FOXP3-BV421 and anti-LAP-PE/Cy7. Cells were then resuspended 200 $\mu$ l PBS. |
| Instrument                | Canto II flow cytometer(BD,#338962)                                                                                                                                                                                                                                                                                                                                                                                                                                                                                                                                                                                                                                                                                                    |
| Software                  | FlowJo and Excel                                                                                                                                                                                                                                                                                                                                                                                                                                                                                                                                                                                                                                                                                                                       |
| Cell population abundance | N/A                                                                                                                                                                                                                                                                                                                                                                                                                                                                                                                                                                                                                                                                                                                                    |
| Gating strategy           | FSC/SSC for single lymphocytes and eFluor780-FVD negative cells were gated as live cells, then T cells were gated as anti-CD3 positive, CD4+ T cells and CD8+ T cells were gated with anti-CD4-FITC and anti-CD8-PE antibodies. Then, CD4 or CD8 positive cells were graphed for IL-2, TNF- $\alpha$ and IFN- $\gamma$ expression. For Tregs, lymphocytes were separated from inguinal lymph nodes near left hind limbs, then live, CD3+CD4+ FoxP3+ T cells were gated and graphed for TGF- $\beta$ expression with the marker LAP (surface latency-associated peptide of TGF- $\beta$ )                                                                                                                                               |

- Tick this box to confirm that a figure exemplifying the gating strategy is provided in the Supplementary Information.
